# Supplementary material
Source: publisher figshare collection journal article supplement (https://tandf.figshare.com/ndownloader/files/27737384)
Supplement: Supplementary file 1 [file 27737384]

| Hollingsworth T. N., A. L.. Breen, R. E. Hewitt, and M. C. Mack. Does fire always accelerate shrub expansion in Arctic tundra? Examining a novel grass-dominated successional trajectory on the Seward Peninsula. Submitted to *Arctic, Antarctic, and Alpine Research* | | | |
| --- | --- | --- | --- |
|
| **Supplemental Table 2:** Kendall correlations of environmental characteristics for NMDS Axis 1, Axis 2, and Axis 3. Correlations with an r^2 >0.25 are in bold. | | | |
|
|  |  |  |  |
|  | Axis 1 | Axis 2 | Axis 3 |
|  | *Tussock to shrub gradient* | *Shortened fire return interval* | *Burn severity gradient* |
| ***Fire Regime Characteristics*** | | | |
| **Burn Severity Score** | 0.149 | -0.239 | **0.431** |
| **Times Burned** | 0.265 | **-0.340** | 0.217 |
| **Time After Fire** | -0.143 | 0.019 | **-0.443** |
| ***Site Characteristics*** | | | |
| **Aspect (Northness)** | -0.034 | -0.173 | **-0.302** |
| Aspect (Eastness) | -0.105 | 0.164 | 0.002 |
| **Elevation** | 0.091 | **-0.385** | -0.310 |
| **Site Moisture** | -0.277 | **0.310** | -0.155 |
| Slope | 0.221 | -0.171 | -0.088 |
| ***Soil Characteristics*** | | | |
| C Pool | -0.303 | -0.015 | -0.229 |
| N Pool | -0.266 | -0.117 | -0.266 |
| **Organic Matter Depth** | -0.283 | **0.302** | -0.192 |
| pH | 0.105 | 0.207 | -0.075 |
| Soil Bulk Density | 0.031 | -0.322 | -0.210 |
| **Bare Soil Percent Cover** | -0.091 | 0.003 | **0.552** |
| Soil Percent C | -0.240 | 0.257 | 0.145 |
| Soil Percent N | -0.124 | -0.208 | -0.250 |
| Soil C:N | -0.085 | 0.343 | 0.319 |
| **Thaw Depth** | 0.130 | 0.058 | **0.445** |
| ***Vegetation Characteristics*** | | | |
| Dead Canopy Height | 0.118 | -0.212 | -0.118 |
| Live Canopy Height | 0.127 | 0.047 | -0.068 |
| Number of Dead Tussocks | -0.057 | 0.057 | -0.003 |
| Shrub Density | 0.082 | 0.442 | 0.117 |
| **Shrub Basal Area** | 0.204 | -0.064 | **-0.308** |
| **Tussock Basal Area** | **-0.715** | -0.037 | -0.037 |
| **Shrub Basal Area:Tussock Basal Area** | **0.617** | 0.130 | -0.073 |
| Forb Percent Cover | 0.302 | 0.134 | -0.094 |
| Total Graminoid Percent Cover | -0.267 | -0.178 | 0.281 |
| **Grass Percent Cover** | 0.234 | **-0.406** | 0.229 |
| **Sedge Percent Cover** | **-0.380** | 0.143 | 0.157 |
| Rush Percent Cover | -0.027 | -0.165 | 0.208 |
| Seedless Vascular Plant Percent Cover | 0.191 | 0.046 | -0.229 |
| Bryophyte Percent Cover | 0.004 | -0.083 | -0.266 |
| Lichen Percent Cover | 0.164 | 0.223 | -0.235 |
| Down Dead Wood Percent Cover | -0.134 | 0.214 | 0.123 |
| Standing Dead Wood Percent Cover | 0.072 | 0.042 | -0.259 |
| Water Percent Cover | -0.133 | 0.122 | 0.112 |
| Litter Percent Cover | 0.026 | 0.096 | 0.130 |
| **Shrub Biomass** | 0.243 | -0.230 | **-0.365** |
| **Total Biomass** | 0.115 | -0.215 | **-0.521** |
